# Interactions between sensory prediction error and task error during implicit motor learning

## Short title: Interactions between errors during implicit motor learning

Jonathan S. Tsay<sup>1,2</sup>, Adrian M. Haith<sup>3</sup>, Richard B. Ivry<sup>1,2</sup>, Hyosub E. Kim<sup>4,5</sup>

<sup>1</sup>*Department of Psychology, University of California, Berkeley*

<sup>2</sup>*Helen Wills Neuroscience Institute, University of California, Berkeley*

<sup>3</sup>*Department of Neurology, Johns Hopkins University*

<sup>4</sup>*Department of Physical Therapy, University of Delaware, Newark*

<sup>5</sup>*Department of Psychological and Brain Sciences, University of Delaware*

### Corresponding author Information:

Name: Jonathan Tsay

Email: [xiaotsay2015@berkeley.edu](mailto:xiaotsay2015@berkeley.edu)

Address: 2121 Berkeley Way, Berkeley, CA 94704

**Key words:** Motor learning, Visuomotor Adaptation, Error Based Learning, Target Jump

### Abstract

Implicit motor recalibration allows us to flexibly move in novel and changing environments. Conventionally, implicit recalibration is thought to be driven by errors in predicting the sensory outcome of movement (i.e., sensory prediction errors). However, recent studies have shown that implicit recalibration is also influenced by errors in achieving the movement goal (i.e., task errors). Exactly how sensory prediction errors and task errors interact to drive implicit recalibration and, in particular, whether task errors alone might be sufficient to drive implicit recalibration remain unknown. To test this, we induced task errors in the absence of sensory prediction errors by displacing the target mid-movement. We found that task errors alone failed to induce implicit recalibration. In additional experiments, we simultaneously varied the size of sensory prediction errors and task errors. We found that implicit recalibration driven by sensory prediction errors could be continuously modulated by task errors, revealing an unappreciated dependency between these two sources of error. Moreover, implicit recalibration was attenuated when the target was simply flickered in its original location, even though this manipulation did not affect task error – an effect likely attributed to attention being directed away from the feedback cursor. Taken as a whole, the results were accounted for by a computational model in which sensory prediction errors and task errors, modulated by attention, interact to determine the extent of implicit recalibration.

36 **Author's summary**

37 What information does the brain use to maintain precise calibration of the sensorimotor system? Using a reaching task  
38 paired with computational modeling, we find that movements are implicitly recalibrated by errors in predicting both the  
39 sensory outcome of movement (i.e., sensory prediction errors) as well as errors in achieving the movement goal (i.e., task  
40 errors). Even though task errors alone do not elicit implicit recalibration, they nonetheless modulate implicit recalibration  
41 when sensory prediction error is present. The results elucidate an unappreciated interaction between these two sources of  
42 error in driving implicit recalibration.

## 43 Introduction

44 Sensorimotor adaptation is an essential feature of human competence, allowing us to flexibly move in novel and changing  
45 environments (Kim, Avraham, & Ivry, 2020; J. Krakauer, Hadjiosif, Xu, Wong, & Haith, 2019; Ryan Morehead & de Xivry,  
46 2021; Shadmehr, Smith, & Krakauer, 2010). Multiple learning processes have been shown to contribute to the performance  
47 changes observed in adaptation tasks, including an aiming process which is explicit, volitional, and learns rapidly and a  
48 recalibration process which is implicit, automatic, and learns slowly (Haith, Huberdeau, & Krakauer, 2015; Hegele & Heuer,  
49 2010; McDougle, Ivry, & Taylor, 2016; Taylor & Ivry, 2011; Taylor, Krakauer, & Ivry, 2014; Werner et al., 2015). Recent  
50 work has focused on how these two learning processes may be driven by distinct error signals: Whereas explicit aiming  
51 responds to task error (TE) – a signal reflecting task performance (Day, Roemmich, Taylor, & Bastian, 2016; Taylor & Ivry,  
52 2011) – implicit recalibration responds to sensory prediction error (SPE) – an error reflecting the difference between  
53 predicted and actual feedback (Donchin, Francis, & Shadmehr, 2003; Kim, Morehead, Parvin, Moazzezi, & Ivry, 2018;  
54 Lee, Oh, Izawa, & Schweighofer, 2018; Mazzoni & Krakauer, 2006; Morehead, Taylor, Parvin, & Ivry, 2017; Shadmehr et  
55 al., 2010; Wolpert, Miall, & Kawato, 1998). Moreover, these two learning processes are thought to rely on distinct neural  
56 modules, with explicit aiming requiring more prefrontal control (Anguera, Reuter-Lorenz, Willingham, & Seidler, 2010;  
57 Benson, Anguera, & Seidler, 2011; Taylor & Ivry, 2014) and implicit recalibration requiring more cerebellar control  
58 (Butcher et al., 2017; Hadjiosif et al., 2014; Izawa, Criscimagna-Hemminger, & Shadmehr, 2012; Schlerf, Xu, Klemfuss,  
59 Griffiths, & Ivry, 2013; Taylor, Klemfuss, & Ivry, 2010; Tseng, Diedrichsen, Krakauer, Shadmehr, & Bastian, 2007).

60  
61 However, recent results from visuomotor rotation tasks have motivated a broader perspective of implicit recalibration, and  
62 in particular, led to the proposal that implicit recalibration is sensitive not only to sensory prediction error, but also to task  
63 outcome. Empirically, the evidence supporting this hypothesis comes from studies in which perturbed visual feedback (the  
64 source of SPE) is combined with a manipulation of target size or target jumps (Cameron, Franks, Inglis, & Chua, 2010a,  
65 2010b; Magescas & Prablanc, 2006) to create a condition in which the visual feedback “hits” the target (Figure 1).  
66 Adaptation in such situations is attenuated by about ~20% compared to that observed in control conditions with a similar  
67 SPE (Kim, Parvin, & Ivry, 2019; Leow, Marinovic, de Rugy, & Carroll, 2018). The hypothesis that implicit recalibration is  
68 sensitive to both SPE and task outcome is consistent with recent neurophysiological observations of reward-related activity  
69 in the cerebellum (Heffley & Hull, 2019; Hull, 2020; Ohmae & Medina, 2015; Sendhilnathan, Ipata, & Goldberg, 2020;  
70 Wagner, Kim, Savall, Schnitzer, & Luo, 2017).

71

72 But how exactly are SPE and task outcome combined to drive implicit recalibration? One possibility is that behavior reflects  
73 the operation of two independent learning processes, one sensitive to SPE and the other sensitive to task outcome (Kim et  
74 al., 2019; Leow et al., 2018). While this dual-error model is consistent with existing findings, it is unknown whether this  
75 reflects the operation of two learning processes that operate independently. For example, it remains to be seen if TE-only  
76 would be sufficient to drive adaptation, as would be predicted by such a dual-error model.

77

78 Alternatively, SPE and task outcome may interact. For example, the strength of the SPE might be modulated by task  
79 outcome; if the displaced cursor still manages to intersect the target, a reward signal linked with task success could weaken  
80 the system's sensitivity to SPE, reducing the rate of recalibration (Gonzalez Castro, Monsen, & Smith, 2011; Shmuelof et  
81 al., 2012). A different form of interaction might arise from processes tangential to recalibration. For example, displacement  
82 of the target, as is commonly used to manipulate TE, might capture attention and weaken the salience of the SPE. In  
83 principle, the interaction between TE and SPE could also be a combination of multiple effects.

84

85 To examine how SPE and TE collectively shape implicit recalibration, we performed a series of visuomotor experiments  
86 that systematically varied the size of these two errors. We also compared participants' performance to a series of  
87 computational models designed to catalogue potential ways in which SPE and TE may interact. To control the size of SPE  
88 (i.e., operationalized as the difference between the cursor feedback and the original target location), we used clamped visual  
89 feedback (Morehead et al., 2017), in which the timing and extent of cursor motion is linked to hand motion, but the cursor  
90 trajectory is offset by a fixed angle relative to the target, and thus independent of the hand trajectory. To control the size of  
91 TE (i.e., operationalized as the difference between the cursor feedback and the new target location), we jumped the target  
92 by a variable amount soon after movement initiation. In all cases, these manipulations were coupled with instructions to  
93 ignore the visual feedback and always reach straight towards the original target – an approach which has been shown to  
94 reliably elicit implicit recalibration without contamination from explicit strategies (Leow et al., 2018; Tsay, Parvin, & Ivry,  
95 2020). These experiments, coupled with computational models, allow us to precisely characterize the effects of SPE and TE  
96 on implicit recalibration.

97

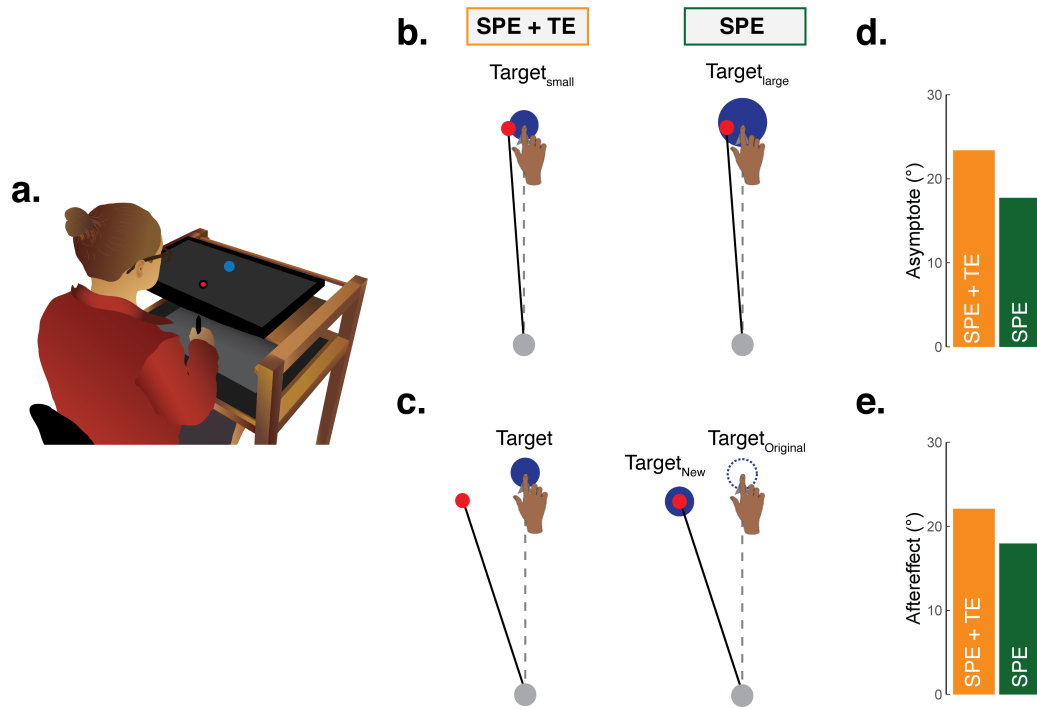

**Figure 1: Implicit recalibration elicited by SPE + TE and SPE-only.** (a) Illustration of experimental apparatus. (b-c) Task outcome was manipulated by either varying the size of the target (Kim et al, 2019) or varying the size of the target jump (Leow et al, 2018). Both SPE and TE are present when the cursor feedback straddles or misses the target, and only SPE is present when the cursor “hits” the target. (d-e) Implicit recalibration, as measured by the asymptote of hand angle in a clamped feedback design in Kim et al 2019 or during no-feedback aftereffect trials in a standard visuomotor rotation design, was reduced when TE was removed.

## 99 Results

### 100 *Experiment 1-2: TE alone is not sufficient to drive implicit adaptation.*

101 We first examined whether TE-only perturbations would elicit implicit recalibration (Figure 2). We induced TEs by jumping  
102 the target a varying amount, between  $\pm 16^\circ$  from trial to trial, while pairing all of these conditions with a clamped cursor that  
103 always moved through the original target (i.e.,  $0^\circ$  clamp). If TE alone is sufficient to elicit implicit recalibration, the  
104 participant's movement would be expected to shift in the direction of the jumped target on the subsequent trial. As a point  
105 of comparison, we also tested a condition in which both SPE and TE varied together, through separate blocks in which  
106 cursor feedback was clamped between  $\pm 16^\circ$  while the target remained stationary (SPE+TE). We expected the participant's  
107 movement would be shifted in the opposite direction of the cursor for these conditions. To ensure that learning was implicit,  
108 participants were instructed to always move directly to the original target location, ignoring both the cursor feedback and  
109 the target jump.

110  
111 In trials when both SPE and TE were present, all participants exhibited robust changes in hand angle to (partially) counter  
112 the imposed error, a key signature of implicit recalibration (Figure 2c; Mean slope  $\pm$  SEM:  $\beta = -0.1 \pm 0.0$ ;  $F_{(1,212)} =$   
113  $136.0$ ,  $p = 1.3 \times 10^{-24}$ ,  $\eta^2 = 0.2$ ). The change in hand angle as a function of error size appeared to be sublinear,  
114 composed of a linear zone for smaller perturbations ( $0^\circ - 4^\circ$ ) and a saturated region for larger perturbations ( $4^\circ - 16^\circ$ ),  
115 consistent with previous reports of saturated learning across a wide range of error sizes (Hayashi, Kato, & Nozaki, 2020;  
116 Kasuga, Hirashima, & Nozaki, 2013; Kim et al., 2018; Morehead et al., 2017; Wei & Körding, 2009).

117  
118 A very different picture was observed in the TE-only blocks. Here participants exhibited no reliable change in hand angle  
119 in response to the TE (Figure 2d;  $\beta = 0.0 \pm 0.0$ ;  $t_{(212)} = 0.6$ ,  $p = 0.69$ ,  $D = 0.1$ ). Critically, there was a striking  
120 interaction between perturbation size and perturbation type ( $\beta = 1.2 \pm 0.1$ ;  $F_{(1,212)} = 61.1$ ,  $p = 2.5 \times 10^{-13}$ ,  $\eta^2 =$   
121  $0.2$ ), where robust implicit recalibration was observed when both SPE + TE were present, but not when TE-only was  
122 provided.

123  
124 As a test of generality, we examined whether TE-only perturbations would elicit implicit recalibration when all perturbation  
125 conditions were scheduled in a random manner, rather than providing TE-only and SPE+TE trials in separate blocks (see

126 Table 3 in the Methods section). Again, robust sign-dependent changes in hand angle were observed for all participants in  
127 the SPE + TE condition (Set A:  $\beta = -0.4 \pm 0.0$ ;  $F_{(1,196)} = 138.7, p = 1.5 \times 10^{-24}, \eta^2 = 0.2$ ; Set B:  $\beta = -0.4 \pm$   
128  $0.0$ ;  $F_{(1,196)} = 128.9, p = 2.8 \times 10^{-23}, \eta^2 = 0.1$ ; Figure 2d & f). In contrast, TE-only trials again failed to elicit any  
129 sign-dependent changes in hand angle (Set A:  $\beta = 0.0 \pm 0.1$ ;  $t_{(196)} = 0.5, p = 0.62, D = 0.1$ ; Set B:  $\beta = 0.0 \pm$   
130  $0.1$ ;  $t_{(196)} = -0.4, p = 0.72, D = 0.1$ ; Figure 2f & h). The interaction between perturbation type and size was replicated  
131 (Set A:  $\beta = 0.4 \pm 0.0$ ;  $F_{(1,196)} = 67.5, p = 2.9 \times 10^{-14}, \eta^2 = 0.2$ ; Set B:  $\beta = 0.4 \pm 0.0$ ;  $F_{(1,196)} = 93.3, p = 2.7 \times$   
132  $10^{-18}, \eta^2 = 0.3$ ), showing robust implicit recalibration when both SPE + TE were present, but not when TE-only was  
133 provided.

134  
135 Together, these results indicate that TE alone is not sufficient to drive implicit recalibration. This stands in contrast to SPE,  
136 which leads to implicit recalibration whether or not TE is present (Kim et al., 2019; Leow et al., 2018; Leow, Marinovic,  
137 de Rugy, & Carroll, 2020). Moreover, these results challenge the hypothesis that SPE and TE operate *strictly* in an  
138 independent manner.

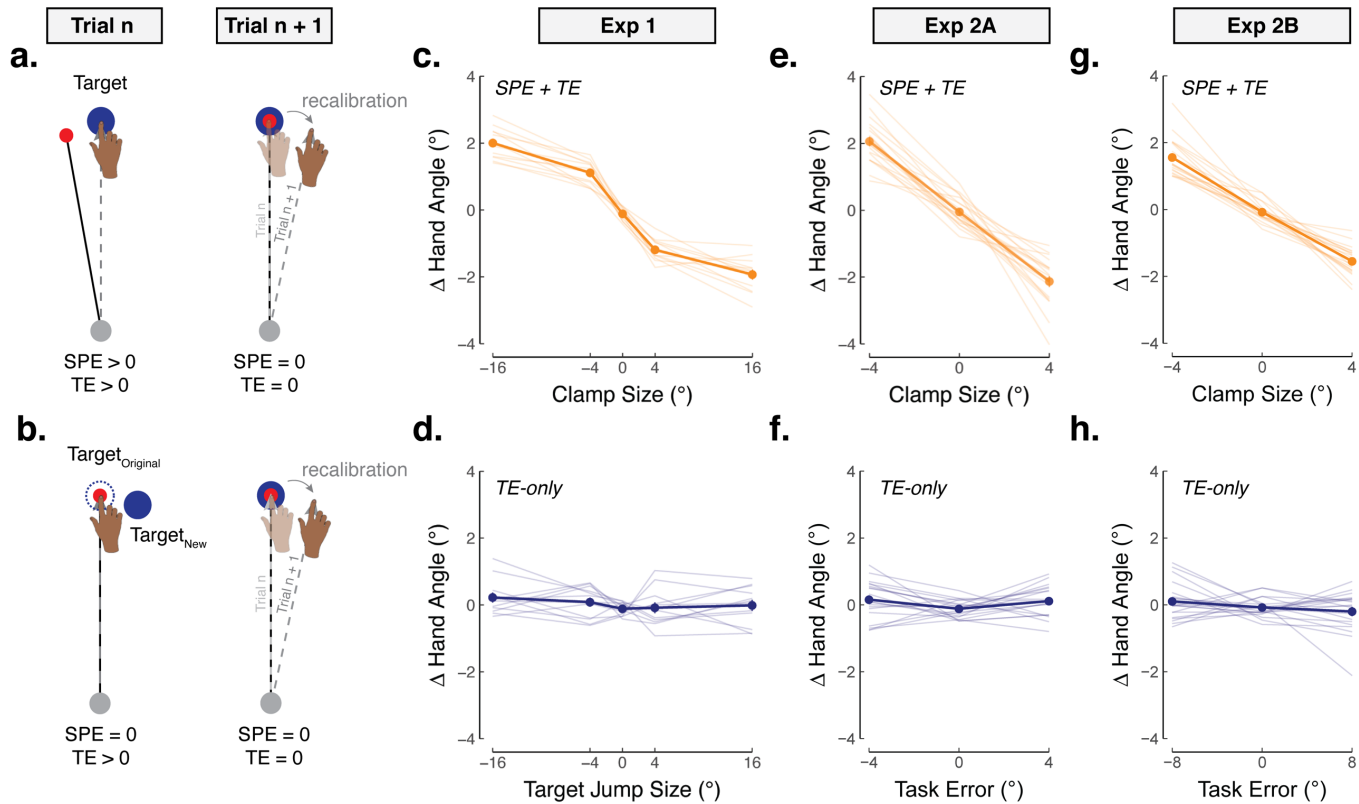

**Figure 2: Task error alone does not elicit implicit recalibration (Exp 1 – 2).** Using clamped visual feedback for testing implicit responses to: (a) SPE + TE, induced by offsetting the cursor trajectory at a fixed angle relative to the target, and (b) task error (TE), induced by jumping the target immediately after movement initiation, with the cursor clamped to 0° (the original target location). (c) – (d) In Exp 1, participants experienced 4 alternating blocks of target jumps and clamped feedback (201 trials/block). The perturbation sizes within a given block were randomized in order to prevent accumulated learning. Adaptation was quantified by measuring how much the hand angle changed on trial n + 1 in response to the perturbation on trial n. (e) – (h) In Exp 2, participants experienced a fully randomized (mixed) schedule of target jumps (Set A with  $\pm 4^\circ$  TE-only perturbations and Set B with  $\pm 8^\circ$  TE-only perturbations) and clamped feedback (both sets with  $\pm 4^\circ$  SPE + TE perturbations). Dots connected with thick line represent the across participant average; thin lines represent individual data. Note that the x- and y-axes are not drawn on the same scale.

### Modeling the potential ways in which TE and SPE may interact to drive implicit recalibration.

Although TE alone may not induce recalibration, previous work has shown that the presence or absence of TE will modulate the response to SPE (Kim et al., 2019; Leow et al., 2018, 2020). To understand the potential ways in which SPE and TE may interact to drive learning, we considered several models that encapsulated a variety of possible mechanisms. Figure 3 shows these models with their predicted responses to a fixed clamp size (i.e., fixed SPE) and varying TE size.

We first consider two simple base models, both of which cannot account for previously established results (including Experiment 1) but will serve as a foundation and a contrast for more elaborated models. The first model is one in which TE does not contribute to implicit recalibration. By this Invariant SPE model, we would expect recalibration to be invariant to



150 the size of target jumps and thus the size of TE (Figure 3a). As noted above, this model is insufficient given the  
151 demonstrations in the literature where the response to feedback involving only SPE is attenuated compared to feedback in  
152 which there is both SPE and TE (Figure 1).

153  
154 The second base model is one in which TE and SPE make independent contributions to implicit recalibration (Dual-Error  
155 model), with their respective contributions simply being summed. Consequently, jumping the target in the same signed  
156 direction as the clamped cursor (e.g., clockwise target jump and clockwise clamp) will decrease the absolute magnitude of  
157 TE (as long as the target displacement is less than twice the magnitude of the cursor perturbation). This ought to decrease  
158 recalibration since SPE and TE make opposing contributions to the behavioral change. Conversely, jumping the target away  
159 from the cursor will increase TE, and thus increase recalibration (Figure 3b). This model, however, cannot account for the  
160 failure of TE-only to elicit recalibration (see Figure 2d, e, f).

161  
162 Building on the failure of these base models, we considered potential ways in which task outcome might influence  
163 recalibration to SPE in an interactive manner. One possible way is based on the hypothesis that recalibration is attenuated  
164 by a scalar intrinsic reward signal that simply indicates whether or not the movement goal was achieved (i.e., whether or  
165 not the cursor “hits” the target) (Cashaback, McGregor, Mohatarem, & Gribble, 2017; Galea, Mallia, Rothwell, &  
166 Diedrichsen, 2015; Izawa & Shadmehr, 2011; Kim et al., 2019; Konrad Paul Körding & Wolpert, 2004; Nikooyan & Ahmed,  
167 2015). The intrinsic reward signal can be interpreted as a gain controller, similar to previous efforts to model the effect of  
168 explicit rewards and punishments on recalibration (Galea et al., 2015). That is, when the movement goal is achieved, the  
169 drive to recalibrate the motor system is reduced. This Rewarded SPE model predicts a transient drop in recalibration only  
170 for a narrow range of target jumps corresponding to the cursor hitting the target (Figure 3c).

171  
172 An alternative model is that recalibration might be modulated by the distracting presence of the target jump, perhaps due to  
173 attention being directed away from processing the feedback signal (Song, 2019; Taylor & Thoroughman, 2007). This  
174 Distracted SPE model is grounded in a rich history of visual psychophysics revealing worse accuracy at detecting,  
175 discriminating, and processing visual stimuli in unattended regions of visual space (Doshier, Sperling, & Wurst, 1986;  
176 Kinchla, 1992). For the model, we assume that displacing the target distracts attention away from the feedback cursor, and  
177 thus decreases the efficacy of recalibration. As a first approximation, we model this as a gaussian gain function in which

178 the attentional cost increases with the magnitude of the target jump (variable cost depicted in Figure 3e), an assumption we  
179 will test in Experiment 4.

180  
181 This attentional hypothesis highlights that jumping the target has two effects: In addition to modifying the size of a putative  
182 TE signal, the standard motivation for this manipulation (Leow et al., 2018, 2020), it is a source of attentional distraction.  
183 One way to separate these factors is to transiently turn off the target while keeping its position fixed. Assuming the flicker  
184 serves to distract attention, this “jump-in-place” condition would identify an attentional cost that is independent of the  
185 change in TE, an assumption we will test in Experiment 3. This attenuating effect is shown in Figure 3e as a fixed attentional  
186 cost, that is, implicit recalibration when the target flickers in the same place during the trial (jump-in-place) would be  
187 attenuated compared to a condition when the target remains stationary and visible throughout the trial (no-jump). This fixed  
188 cost rides on top of a variable attentional cost that is dependent on the distance of the target displacement.

189  
190 The Rewarded SPE (Figure 3c) and Distracted SPE (Figure 3e) models consider the modulatory effects of intrinsic reward  
191 and attention on a base model in which TE does not directly influence implicit recalibration (the Invariant SPE model). We  
192 also considered how the modulatory effects of reward and attention might influence implicit recalibration if both SPE and  
193 TE drive learning (Dual-Error model). The predictions of these hybrid, dual-error models are presented in Figures 3d  
194 (Rewarded SPE+TE) and 3f (Distracted SPE + TE), both of which predict an asymmetrical effect of target jumps.

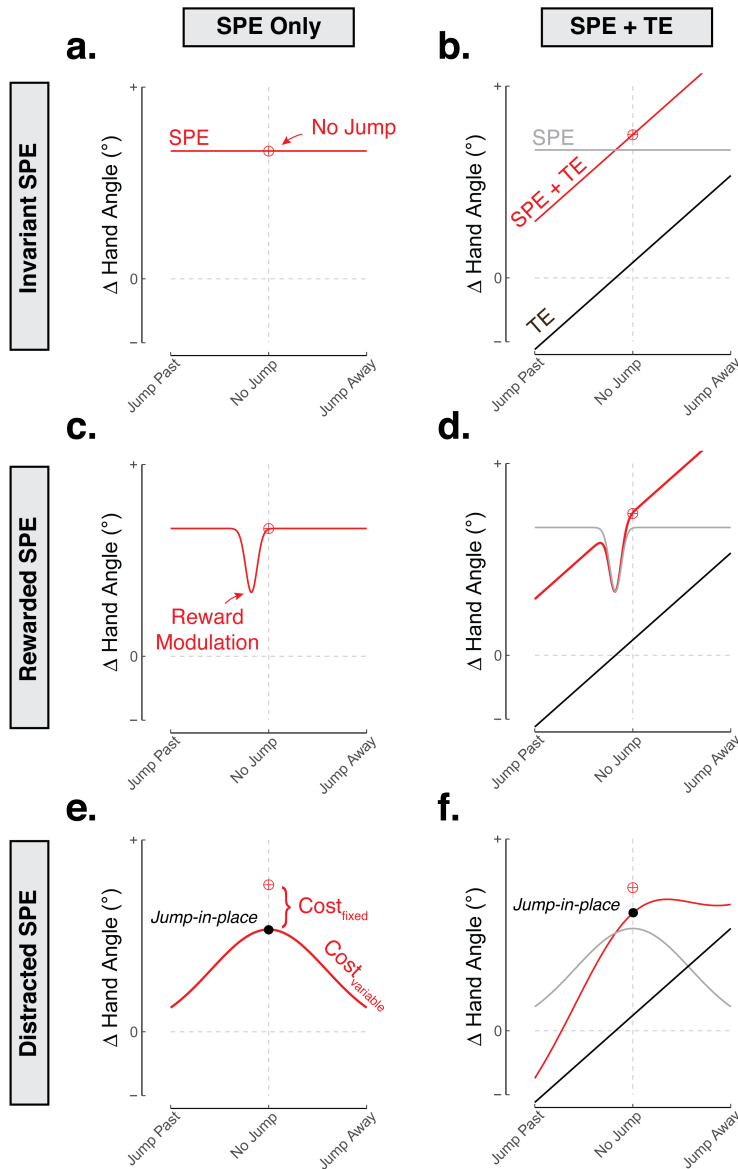

**Figure 3: Modeling the influence of target jumps on adaptation to TE and SPE.** Given a constant SPE magnitude, SPE may be (a) impervious to target jumps (b) attenuated when the cursor “hits” the target (modulated by intrinsic reward), or (c) attenuated due to the motion of the jumping target diverting attention away from computing a SPE. The attenuation is assumed to be driven by the mere presence of a target jump (fixed cost – an effect isolated by flickering the target, also known as the jump-in-place condition) and varied with target jump size (variable cost). Right column (b), (d), (f): Adaptation may also be driven by a TE-based learning process, assumed here to be a linear function of the distance between the feedback and new position of the target. The red indicates expected behavior, which is the composite of the SPE process (grey) and TE-based process (black).

195

196

197

*Experiment 2: TE modulates implicit recalibration in the presence of SPE.*

198

To empirically examine the interactions between SPE and TE, and evaluate the models described above, we performed a

199

second experiment in which we varied the size of target jumps in the context of an SPE, induced by non-zero clamped

200

feedback (see Table 3). To vary the size of TE, we jumped the target between  $\pm 8^\circ$  away from the original target location.

201 For the non-zero SPE, we clamped the cursor at  $\pm 4^\circ$  from the original target, randomizing the direction of the feedback  
202 cursor from trial to trial.

203  
204 In response to a stationary target (i.e., no jump), participants adapted  $1.5^\circ$  in response to a  $4^\circ$  clamp (Figure 4a). When the  
205 target jumped towards the cursor, implicit recalibration was reduced in a roughly stepwise, linear manner (Table 3): Jump-  
206 to (i.e., target jumps to the cursor) reduced implicit recalibration by 13% and jump-past (i.e., target jumps in the direction  
207 of *and* beyond the cursor) reduced implicit recalibration by 33%. The fact that jumping the target influenced behavior argues  
208 against the Invariant SPE model; task outcome indeed influences behavior in the presence of SPE. The graded effect is also  
209 not compatible with the Rewarded SPE models (Figure 3c, d), as these models predict a modulating effect of target jumps  
210 only when the target intersects the cursor feedback, providing a putative intrinsic reward.

211  
212 Implicit recalibration was greater when the target jumped away from the cursor compared to when it jumped past ( $0.3 \pm$   
213  $0.1$ ;  $t_{(77)} = 2.6$ ,  $p = 0.01$ ,  $D = 0.8$ ) (Figure 4a; Table 1). This pattern is most consistent with the unique, asymmetrical  
214 function predicted by the Distracted SPE + TE model (Figure 3e) and refutes the symmetrical function predicted by the  
215 Distracted SPE-only model (Figure 3f). That is, implicit recalibration may be dependent on both SPE and TE (conditioned  
216 on the presence of SPE), although the act of manipulating TE via target jumps may have a distracting effect that reduces  
217 sensitivity to SPE.

218  
219 *Experiment 3: Target jumps vary the size of TE but also attenuate implicit recalibration.*

220 Exp 3 was designed to provide a strong test of the assumption that jumping the target distracts attention: Namely we predict  
221 that recalibration in response to an SPE will be attenuated by distraction, even if the distracting event does not influence TE  
222 (or SPE). To test this prediction, we introduced a condition in which the target was perturbed *without* changing locations,  
223 disappearing upon movement initiation and then reappearing in its original location on the next screen refresh (jump-in-  
224 place; i.e., flickering the target). The difference between implicit recalibration for no-jump (i.e., stationary target) and jump-  
225 in-place should indicate the effect of distraction. By varying the size of the SPE, we can ask if the magnitude of the  
226 distraction effect is independent of SPE magnitude. To test this prediction, we used two clamp sizes ( $\pm 3^\circ$  and  $\pm 7^\circ$ ). Because  
227 the experiment was conducted online (in response to COVID pandemic restrictions regarding in-person testing), we were  
228 able to increase the sample size.

229

230 On average, participants adapted  $1.1^\circ$  and  $1.5^\circ$  in response to  $3^\circ$  and  $7^\circ$  clamps, respectively (no jump; Figure 4b-c; Table  
231 1). Strikingly, the response was attenuated in the jump-in-place conditions despite the fact that the SPE and TE were  
232 identical to that in the corresponding no-jump conditions. Moreover, the magnitude of this effect, which represents the fixed  
233 attentional cost on recalibration, was similar for the two clamp sizes,  $\sim 40\%$  (no interaction:  $= 0.4 \pm 0.0$ ;  $F_{(3,294)} =$   
234  $0.1, p = 0.96, \eta^2 = 0$ ). In addition to the fixed attentional cost due to the flicker of the target, we observed an approximately  
235 linear effect of TE on implicit recalibration. For instance, in Exp 3A recalibration was larger by approximately  $0.5^\circ$  in the  
236 jump-in-place condition compared to the jump-to condition, and increased by another  $0.5^\circ$  in the jump-away condition  
237 (Table 1). This linear effect of TE is uniquely predicted by the Distracted SPE + TE model.

238

239 In summary, the results indicate that perturbing the target yields 1) an asymmetrical hand angle function, 2) a fixed cost  
240 most clearly evident in the jump-in-place condition, and 3) a linear effect of TE *after* accounting for this fixed attentional  
241 cost. These three effects, in aggregate, provide strong support that jumping the target not only modulates the size of the TE,  
242 but also attenuates the extent of recalibration from SPE (Distracted SPE+TE model). Notably, these results were replicated  
243 both in-lab and online settings.

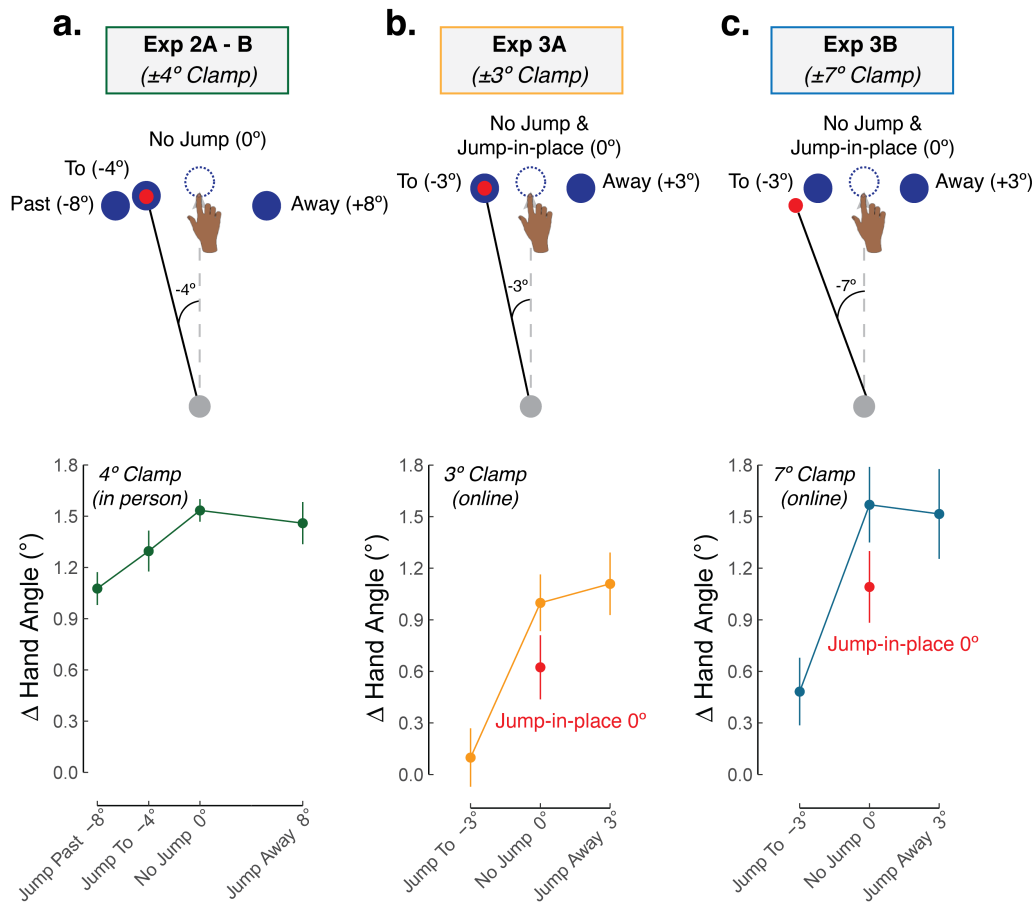

**Figure 4: Implicit recalibration is modulated by TE in the presence of SPE (Exp 2 – 3).** (a) – (c) Participants experienced a randomized zero-mean perturbation schedule where both clamp size (Exp 2, in-person:  $\pm 4^\circ$  clamp; Exp 3, online:  $\pm 3^\circ$  or  $\pm 7^\circ$ ) and target jump size (Exp 2 range: -8 to 8; Exp 3 range: -3 to 3) were varied. A positive change in hand angle signified recalibration in the expected direction, by flipping the sign of hand angles in response to counterclockwise (+) clamped feedback and clockwise (-) target jumps. Dots represent mean and vertical lines represent SEM.

| Table 1              | Exp 2A-B<br>( $-4^\circ$ Clamp) |            |           |            | Exp 3A<br>( $-3^\circ$ Clamp) |               |           |            | Exp 3B<br>( $-7^\circ$ Clamp) |               |           |            |
|----------------------|---------------------------------|------------|-----------|------------|-------------------------------|---------------|-----------|------------|-------------------------------|---------------|-----------|------------|
|                      | Past                            | To         | No Jump   | Away       | To                            | Jump-in-place | No Jump   | Away       | Near                          | Jump-in-place | No Jump   | Away       |
| Target Jump Size     | $-8^\circ$                      | $-4^\circ$ | $0^\circ$ | $+8^\circ$ | $-3^\circ$                    | $0^\circ$     | $0^\circ$ | $+3^\circ$ | $-3^\circ$                    | $0^\circ$     | $0^\circ$ | $+3^\circ$ |
| Mean (SEM)           | 1.1 (0.1)                       | 1.3 (0.1)  | 1.5 (0.1) | 1.4 (0.1)  | 0.1 (0.2)                     | 0.6 (0.2)     | 1.0 (0.2) | 1.1 (0.2)  | 0.5 (0.2)                     | 1.1 (0.2)     | 1.5 (0.2) | 1.5 (0.2)  |
| Mean – No Jump (SEM) | -0.5 (0.1)                      | -0.2 (0.1) |           | -0.1 (0.1) | -1.0 (0.2)                    | -0.4 (0.2)    |           | 0.0 (0.2)  | -1.0 (0.2)                    | -0.4 (0.2)    |           | 0.0 (0.2)  |
| <i>D</i>             | -1.0                            | -0.4       |           | -0.2       | -0.8                          | -0.3          |           | 0.0        | 0.3                           | 0.2           |           | 0.1        |
| <i>P</i>             | <0.001                          | 0.14       |           | 0.42       | <0.001                        | 0.02          |           | 0.88       | <0.001                        | 0.02          |           | 0.88       |

**Table 1: Summary of model-free results.** Mean estimates (SEM) from the linear mixed effect model for each target jump condition. Changes in hand angle in response to counterclockwise (+) clamped feedback were flipped to clockwise (-), such that a positive change in hand angle always signify adaptation in the expected direction (i.e., away from the clamped feedback). Contrasts between no jump and other target jump conditions are also shown, with Cohens' D and P values provided. Significant contrasts ( $P < 0.05$ ) are highlighted in a shaded light-grey box.

245 *Experiment 4: Implicit recalibration reflects the joint contribution of TE, SPE, and the distractive effects of target jumps*

246 To further probe how the distracting effect of target jumps interacts with the magnitude of TE, we sampled a wide range of  
247 target jump sizes in Experiment 4 (Figure 5a). As shown in Figure 3f, we assume that the attenuating effect of distraction  
248 will increase with the size of the target jump due to attention being further displaced from the feedback cursor. As such, the  
249 inclusion of a larger range of target jumps should produce a marked asymmetrical function.

250  
251 This prediction was confirmed (Figure 4b): Implicit recalibration decreased when the target jumped towards the cursor and  
252 remained relatively invariant when the target jumped away from the cursor, even as far as 30° (jump-away). This  
253 phenomenon could be attributed to the contribution of a TE process that offsets the attentional costs of target jumps on a  
254 SPE-based implicit recalibration process.

255  
256 Sampling a wider range of target jumps also allowed us to fit our candidate models to the data (see formalization in Table  
257 4 of the Methods section). In doing so, we could quantitatively evaluate how well our six candidate models fit the data while  
258 taking into account model complexity. Consistent with the qualitative assessments described above, the Distracted SPE +  
259 TE model provided the best fit, having the highest  $R^2$  and lowest AIC (Table 2).

260  
261 The modeling work also allowed us to evaluate the best fitting parameters of the Distracted SPE + TE model. The parameter  
262 values suggest that TE may contribute to learning. The slope ( $\beta_{TE}$ ) of the TE function was  $0.02 \pm 0.003$ , suggesting that  
263 of the 0.5° change in hand angle observed for the 3° no-jump condition (where both SPE and TE are present), ~12% of the  
264 change came from TE. Similarly, when the error increased to 7° in a no-jump condition, ~16% of the 0.09° change in hand  
265 angle came from TE. These results indicate that SPE has a much larger impact on implicit adaptation compared to TE.

266  
267 The Distracted SPE + TE model has two parameters to capture the effects of perturbing the target. First there is a fixed  
268 effect arising from the transient changes that occur when the target is perturbed. The estimate of this parameter ( $C_J$ ) in the  
269 best fitting model was  $0.84 \pm 0.13$ . Thus, the mere perturbation of the target, even if it was not spatially displaced reduced  
270 recalibration by 15%. Second there is a variable cost ( $\sigma_d^2$ ) due to SPE-based learning being attenuated as the target jump

271 distance increased. The estimate of this parameter was  $11.8 \pm 2.3$ . From this value, SPE would no longer be effective in  
 272 driving implicit recalibration for target jumps greater than  $35^\circ$ .

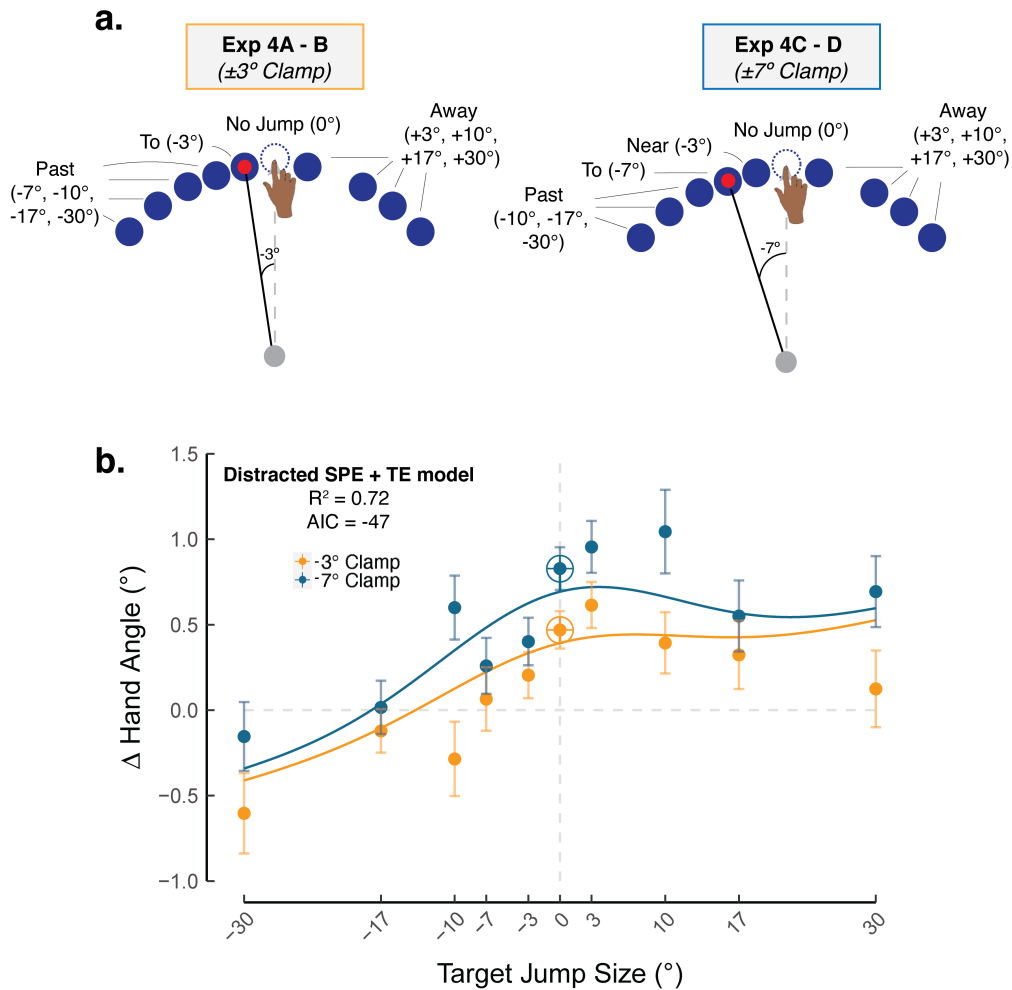

**Figure 5: Implicit recalibration reflects the contribution of learning from task error and sensory prediction error, with the latter sensitive to distraction from target jumps (Exp 4).** (a-b) Participants experienced a randomized zero-mean perturbation schedule with clamp sizes ( $-3^\circ$  shown in orange;  $-7^\circ$  shown in blue)  $\times$  target jumps (x axis,  $-30^\circ$  through  $30^\circ$ ). The Distracted SPE + TE model was the winning model.

| Table 2        | SPE Only        |       |     | SPE + TE        |       |     |
|----------------|-----------------|-------|-----|-----------------|-------|-----|
|                | # of free param | $R^2$ | AIC | # of free param | $R^2$ | AIC |
| Invariant SPE  | 0               | -0.54 | -18 | 1               | -0.54 | -18 |
| Rewarded SPE   | 2               | 0.15  | -28 | 3               | 0.53  | -37 |
| Distracted SPE | 2               | 0.33  | -33 | 3               | 0.72  | -47 |

**Table 2: Summary of model-based results.**

273



## Discussion

Although it is widely recognized that implicit sensorimotor recalibration serves to minimize motor execution errors, the error signals that drive this learning process remain the subject of considerable debate (Kim et al., 2020; J. Krakauer et al., 2019; Shadmehr et al., 2010). In particular, the idea that sensory prediction error (SPE), the mismatch between the expected and actual feedback, is the sole learning signal has been challenged by recent evidence demonstrating that task error (TE), the mismatch between the target location and feedback may also impact implicit recalibration (Albert et al., 2020; Kim et al., 2019; Leow et al., 2018; Miyamoto, Wang, & Smith, 2020). Whether these two types of error drive implicit recalibration independently or interactively remains unknown.

In traditional sensorimotor adaptation tasks, SPE and TE are confounded. Displacing the hand in a force field or perturbing the feedback in a visuomotor rotation task introduces both SPE and TE. To unconfound these signals, researchers have developed methods that selectively influence one signal or the other. For example, by making the angular trajectory of the feedback cursor independent of the movement, an SPE of a fixed size may either be accompanied by TE (when the target is small, and the cursor misses the target) or occur without TE (when the target is large, and the cursor hits the target). Conversely, displacing the target (i.e., target jump) selectively modulates TE given the assumption that the expected location of the feedback remains at the original target location.

Building on these methodological advances, we designed a series of experiments to systematically manipulate SPE and TE and used the data to test a set of computational models. We first considered a model in which these two types of error make independent contributions to implicit recalibration, with the resultant behavior being the composite operation of two distinct learning processes (Figure 3a, b). This idea takes inspiration from the work of Mazzoni and Krakauer (2006) who showed that implicit recalibration continued to operate even in the absence of task error, a result that suggests SPE-dependent learning is modular. A natural extension of this modular, dual-error model would posit that TE alone should also be sufficient to drive implicit recalibration. In three experiments, we failed to find support for this hypothesis. When the clamped feedback moved directly to the original target location (no SPE), hand angle remained unchanged in response to target jumps. That is, TE in the absence of SPE failed to induce implicit recalibration, arguing against models in which SPE-dependent and TE-dependent learning processes operate in a strictly independent manner.

302 Given the failure of this simple model and the dependency of TE on SPE, we considered different ways in which SPE-  
303 dependent and TE-dependent processes might interact. We varied task outcome in a continuous manner by jumping the  
304 target, either away from the perturbed cursor (increasing TE), towards the perturbed cursor (reducing TE), or to the location  
305 of the perturbed cursor (nullifying TE; i.e., SPE only). In stark juxtaposition to the failure of TE only to elicit implicit  
306 recalibration, SPE only reliably elicited implicit recalibration, which is a finding consistent with previous literature (Kim et  
307 al., 2019; Leow et al., 2018, 2020).

308  
309 By modulating TE in a fine-grained, continuous manner, we revealed an unexpected, asymmetrical effect on implicit  
310 recalibration: Implicit recalibration decreased when TE decreased yet remained largely unaffected when TE increased.  
311 These results are at odds with the hypothesis that task outcome provides a *binary* reward signal (Figure 3c, d), with TE  
312 being present when the cursor misses the target and TE being absent when the cursor hits the target (Cashaback et al., 2017;  
313 Galea et al., 2015; Kim et al., 2019; Konrad Paul Körding & Wolpert, 2004; Nikooyan & Ahmed, 2015). This asymmetrical  
314 function is also at odds with the hypothesis where SPE-learning, the sole process driving implicit recalibration, is attenuated  
315 by a generic distractor effect of displacing the target (Figure 3e).

316  
317 Instead, the pattern of results supports a hybrid model, where implicit recalibration is driven by both TE and SPE, with each  
318 error signal having a modulatory effect on the other error signal (Figure 3f). Implicit recalibration scales with the size of  
319 TE, but only when SPE is also present. Implicit recalibration also scales with the size of SPE but is attenuated when the  
320 target is perturbed. We hypothesize that the modulation of SPE-based learning occurs because attention is directed away  
321 from the feedback cursor and towards the (displaced) target, an effect that increases with the size of the displacement. Taken  
322 together, this hybrid perspective underscores the rich, dynamic interplay between two distinct error signals that drive  
323 implicit recalibration in an interactive manner.

324  
325 We recognize that at this stage of development, the models are largely descriptive, intended to provide a qualitative sense  
326 of the behavioral changes that would be expected given different ways in which sensory prediction error and task error  
327 might interact. Future work will be required to develop stronger theoretical foundations and more rigorous experimental  
328 tests for the different assumptions underlying the models; for example, to ask if the signals follow normative principles such  
329 as optimal integration (Burge, Ernst, & Banks, 2008; Ernst & Banks, 2002) or relevance estimation (Wei & Körding, 2009).

330

331 While implicit recalibration seems to scale with TE in the presence of SPE, it remains unclear why TE alone fails to elicit  
332 recalibration. One possibility is that SPE serves as a gating signal, with recalibration only engaged in the presence of SPE  
333 and then responding to all sources of error information. Alternatively, the lack of an SPE may allow the brain to correctly  
334 attribute the target jump to an external cause (Konrad P. Körding et al., 2007; Shams & Beierholm, 2010; Wei & Körding,  
335 2009). In contrast, when a TE occurs in the presence of an SPE, the brain may be less confident in attributing the error to  
336 an external cause and, as such, use both sources of information to recalibrate the sensorimotor system. This latter hypothesis  
337 might account for the recent findings of Ranjan and Smith (2020) who observed robust adaptation in response to TE alone,  
338 a result at odds with the current study (Ranjan & Smith, 2020). Whereas our participants were told to ignore the  
339 manipulations of the cursor and the target, Ranjan and Smith instructed participants to hit the target with their cursor. These  
340 instructions may have rendered the position of the displaced target and the cursor relevant, thereby motivating participants  
341 to recruit more explicit re-aiming strategies to reduce TE (Oza, Kumar, & Mutha, 2020).

342

343 The current study also highlights an important methodological issue. Similar to the way error clamps have provided a tool  
344 to isolate implicit recalibration, target jumps have been viewed as a way to provide a “pure” manipulation of TE. However,  
345 our results show an attenuated effect on implicit recalibration from the transient effects associated with perturbing the target,  
346 a result made salient by the conditions in which the target briefly disappeared and then reappeared at its original location.  
347 The transient sensory events associated with a target jump or flash might siphon attention away from the visual feedback,  
348 thereby weakening the overall learning signal. Alternatively, a transient distraction may have increased the likelihood that  
349 visual feedback is mis-localized, thus attenuating the motor system’s reliance on this uncertain feedback (Burge et al., 2008;  
350 Konrad P. Körding & Wolpert, 2004; Tsay, Avraham, et al., 2020; Tsay, Kim, Parvin, Stover, & Ivry, 2021; Wei & Körding,  
351 2010). Regardless of the mechanism, our results underscore the importance of considering the distractive effect of a target  
352 jump manipulation and the consequences of this on implicit recalibration.

## 353 **Methods:**

### 354 *Participants and Apparatus*

355 All participants were between 18 – 30 years old and right-handed, as determined by either the Edinburgh handedness  
356 inventory (Oldfield, 1971) or through self-report. The protocol was approved by the IRB at University of Delaware and UC  
357 Berkeley.

358  
359 In-person participants (Exp 1 – 2): Undergraduate students were recruited from the University of Delaware community,  
360 receiving financial compensation for their participation at a rate of \$10/hour. Participants were seated in front of a custom  
361 tabletop setup and held the handle of a robot manipulandum (KinArm: BKIN Technologies, sampling rate 200 Hz) that was  
362 positioned below a mirror. Visual feedback was projected by a monitor placed directly above onto the mirror, which  
363 occluded vision of the participant’s hand during the experiment. Peripheral vision of the arm was minimized by  
364 extinguishing the room lights. Participants completed the task by moving the robot manipulandum, which was constrained  
365 to a horizontal 2D plane.

366  
367 Online participants (Exp 3 – 4): Participants were recruited via Amazon Mechanical Turk, receiving financial compensation  
368 for their participation at a rate of \$8/hour. Participants used their own laptop computer to access a customized webpage  
369 (Tsay, Lee, Ivry, & Avraham, 2021) hosted on Google Firebase (sampling rate typically ~60 Hz) (Anwyl-Irvine, Dalmaijer,  
370 Hodges, & Evershed, 2020; Bridges, Pitiot, MacAskill, & Peirce, 2020). Recruitment was restricted to trackpad users to  
371 minimize variability from different response devices. Participants completed the task by swiping their index finger on the  
372 trackpad.

### 374 *Reaching Task Procedure*

375 In-person procedure: Reaches were made from a start location to one target (90° location, straight ahead). The start location  
376 was indicated by a white ring (6 mm diameter) and the target by a blue circle (6 mm diameter), with the radial distance  
377 between the start location and target fixed at 10 cm. To initiate a trial, the robot arm moved the participant’s hand to the  
378 start location. Visual feedback of the hand position was given via a cursor (white circle 3.5 mm diameter) only when the  
379 hand was within 1 cm of the start position. Once the hand remained within the start location for 500 ms, the target appeared,

380 serving as a cue to indicate the location of the target and an imperative to initiate the reach. To discourage on-line corrections,  
381 participants were instructed to perform fast, ‘shooting’ movements through the target as soon as the target appeared.

382  
383 Reaction time (RT) was defined as the time from initial target presentation to the start of movement (defined as when the  
384 hand first exceeded 5 cm/s for at least 50 milliseconds). Movement time (MT) was defined as the time between the start of  
385 movement and when the hand crossed the radial target distance of 10 centimeters. To ensure that participants moved at a  
386 fast speed that excluded online feedback corrections, the message “Too Slow” appeared on the screen at the end of the trial  
387 when MT was < 40 cm/s at peak velocity. We also presented the message “Too Fast” if MT was > 70 cm/s at peak velocity  
388 to ensure that participants did not make simple ballistic movements in the general direction of the target (this criterion was  
389 rarely exceeded). After completing the reach, the participant was instructed to keep the arm and shoulder relaxed as the  
390 robot moved the hand back to the starting position.

391  
392 Online procedure: The reaching task was adapted for an online study. We did not obtain information concerning the monitors  
393 used by each participant; as such, we cannot specify the exact size of the stimuli. However, from our experience in  
394 subsequent studies, we assume that most online participants used a laptop computer. To provide a rough sense of the  
395 stimulation conditions, we assume that the typical monitor had a 13” screen with a width of 1366 pixels and height of 768  
396 pixel (Anwyl-Irvine et al., 2020). The center position was indicated by a white circle (0.5 cm in diameter) and the target  
397 location was indicated by a blue circle (also 0.5 cm in diameter). To ensure that reaches remain in the trackpad, we reduced  
398 the radial distance of the target to 6 cm and positioned the target at the 45° target (upper right quadrant).

399  
400 The participant made center-out planar movements by moving the computer cursor with her trackpad to a visual target. To  
401 initiate each trial, the participant moved their hand to the start location. Visual feedback of the hand position was given via  
402 a cursor (white circle 0.5 cm diameter) when the hand was within 1 cm of the start position. Once the hand remained within  
403 the start location for 500 ms, the target appeared, serving as a cue to indicate the location of the target and an imperative to  
404 initiate the reach. To discourage on-line corrections, participants were instructed to perform fast, ‘shooting’ movements  
405 through the target as soon as the target appeared.

RT was defined as the time from initial target presentation to the start of movement (i.e., when the hand movement exceeded 1 cm from the start location). Due to the lower sampling rate of standard computer monitors compared to in-person setup, we opted to define RT in terms of movement distance (requiring fewer samples) rather than movement velocity (requiring more samples to adequately estimate). There were no constraints on RT. MT was defined as the time between the start of the movement and when the radial distance of the movement reached 6 cm. To ensure that the movements were made quickly, the computer displayed a “too slow” message if MT exceeded 300 ms. We did not include a “too fast” message since participants recruited online, based on our pilot results, err on the side of moving too slowly.

There were three types of cursor feedback trials used throughout the in-person and online experiments: On veridical feedback trials, the cursor corresponded to the position of the hand. On clamped feedback trials, the cursor followed an invariant path along a constant angle with respect to the target. The radial distance of the cursor, relative to the start position, was yoked to the participant’s hand. In both types of feedback trials, the radial position of the cursor matched the radial position of the hand until the movement amplitude reached the radial distance of the target, at which point the cursor froze for 50 ms. On no-feedback trials, the cursor was blanked when the target appeared, and did not re-appear until the participant had completed the reach and returned to the start location for the next trial.

There were also target jump trials, where upon movement initiation (i.e., in-person: velocity > 5 cm/s; online: radial distance > 1 cm), the original target was blanked and immediately re-positioned at a new target location (i.e., one screen refresh between offset of original target to onset of new target; in-person: within 1 ms; online: <15 ms, accounting for the delay in the monitor system (Anwyl-Irvine et al., 2020; Bridges et al., 2020)). We varied the size of the target jump and categorized these based on the relative position of the new target location to the clamped cursor position: jump-past, jump-to, jump-near, jump-away, and jump-in-place. When the target jumps in the direction of the the clamped cursor feedback, the size of the target jump could either be greater than (jump-past), equal to (jump-to), or less than (jump-near) the clamped angle. On jump-away trials, the target was repositioned in the direction opposite to the clamped feedback. On jump-in-place trials, the target disappeared upon movement initiation (1 refresh) and then reappeared (1 refresh) in the same (original) location (<30 ms, accounting for delays in the system). While jump-in-place has a longer interval between successive displays of the target compared to other target jump conditions, this interval ensured that jump-in-place trials elicited a detectable disturbance to the visual display, something that was obvious in the other target jump conditions.

135

| Table 3 | N     | Setting   | Perturbation Conditions |                |                                   |        |
|---------|-------|-----------|-------------------------|----------------|-----------------------------------|--------|
|         |       |           | Set                     | Clamp size (°) | Target jump (°)                   | Figure |
| Exp 1   | 12    | In-Person | ---                     | 0, ±4, ±16     | 0                                 | 2c     |
|         |       |           |                         | 0              | 0, ±4, ±16                        | 2d     |
| Exp 2   | 40    | In-Person | A                       | -4             | 0, -4, -8                         | 2e, 3a |
|         |       |           |                         | +4             | 0, +4, +8                         |        |
|         |       |           |                         | 0              | 0, ±4                             | 2f     |
|         |       |           | B                       | ±4             | 0, ±8                             | 2g, 3a |
| 0       | 0, ±8 | 2h, 3a    |                         |                |                                   |        |
| Exp 3   | 100   | Online    | A                       | ±3             | ±3, 0, 0 <sub>jump-in-place</sub> | 3b     |
|         |       |           | B                       | ±7             | ±3, 0, 0 <sub>jump-in-place</sub> | 3c     |
| Exp 4   | 210   | Online    | A                       | +3             | -10, -3, 0, +3, +7, +10, +17      | 4b     |
|         |       |           |                         | -3             | +10, +3, 0, -3, -7, -10, -17      |        |
|         |       |           | B                       | +7             | -10, -3, 0, +3, +7, +10, +17      |        |
|         |       |           |                         | -7             | +10, +3, 0, -3, -7, -10, -17      |        |
|         |       |           | C                       | ±3             | ±0, ±10, ±17, ±30                 |        |
|         |       |           | D                       | ±7             | ±0, ±10, ±17, ±30                 |        |

**Table 3: Summary of experiments.**

136

137

*Experiment 1 – 2, In-person Experiments*

Reaching trials were performed to the 90° target (straight ahead). The experiment began with 100 baseline reaching trials with veridical feedback, provided to familiarize the participants with the reaching task. These trials were used to emphasize that movements should “shoot” through the target and demonstrate that the feedback and target would disappear soon after the movement amplitude exceeded the radial distance of the target.

143

The participant then completed a block of perturbation trials. Just before the start of this block, the error clamp and target jump manipulations were described to the participant, and she was told to ignore the cursor “feedback” as well as any change in the position of the target, always attempting to reach directly to the original target. To help the participant understand the task irrelevant nature of the clamped feedback and target jump, three demonstration trials were provided. The target appeared straight ahead at 90° and the participant was told to reach to the left (demo 1), to the right (demo 2), and backward (demo 3). The cursor moved in a straight line with a 45° offset from the original target in all three trials, and the target “jumped” upon movement initiation 0° (demo 1), 45° (demo 2), and 90° (demo 3) away from the original target.

151

152 In Exp 1, the perturbation block was composed of mini-blocks (Table 3; 804 perturbation trials = 4 mini-blocks x 201  
153 trials/mini-block) of either SPE + TE perturbations (i.e., when clamped feedback is paired with a stationary target) or TE-  
154 only perturbations (i.e., when a 0° clamp is paired with a target jump). We opted to keep these perturbation conditions  
155 separate to minimize any interference or generalization of learning from one trial type to another (Dang, Parvin, & Ivry,  
156 2019; J. W. Krakauer, Ghilardi, & Ghez, 1999; Lerner et al., 2020). SPE + TE and TE-only mini-blocks were interleaved,  
157 with the order counterbalanced across individuals. Within each mini-block, there were 20 trials per condition provided in a  
158 random, zero-mean order (with the exception of 21 trials for 0° clamp x 0° target jump). This resulted in 80 trials per clamp  
159 size x target jump combination across the entire experiment (84 trials in the 0° clamp, 0° target jump condition).

160  
161 The perturbation block in Exp 2 was not composed of mini-blocks. Instead, we opted to randomize all perturbation  
162 conditions across the entire experiment (724 trials) to evaluate whether our results from Exp 1 would hold under another  
163 perturbation schedule. To sample a wider range of clamp size x target jump combinations while keeping the experiment  
164 within 1 hour to minimize fatigue, participants experienced different sets of perturbations (Set A or Set B). In Set A, the  
165 target always jumped in the same direction as the error clamp, while in Set B, the target either jumped in the same or in the  
166 opposite direction of the error clamp (Table 3). There were 80 trials per clamp size x target jump combination (84 trials for  
167 the 0° clamp, 0° target jump condition).

### 168 169 *Experiment 3 – 4, Online Experiments*

170 Due to the onset of the pandemic, Exp 3 – 4 were conducted online. With this approach, we were able to increase our sample  
171 size in an efficient manner, providing greater power to detect subtle differences between target jump conditions. We used  
172 an motor learning platform (OnPoint) (Tsay, Lee, et al., 2020, 2021) and recruited participants using Amazon Mechanical  
173 Turk. Despite substantial differences between in-person and online sensorimotor learning experiments (e.g., in-person: dark  
174 room to occlude vision of the hand; online: full visibility of the hand for trackpad users), we have found that the results  
175 obtained online are quite similar to those obtained in-person (Tsay, Lee, et al., 2021).

176  
177 We made several additional changes to the experiment. We included “attention checks” to verify whether participants  
178 attended to the task. Specifically, during the inter-trial interval, participants occasionally were instructed to make an arbitrary  
179 response (e.g., “Press the letter “b” to proceed.”). If participants failed to make the specified keypress, the experiment was



terminated. These attention checks were randomly introduced within the first 50 trials of the experiment. We also included “instruction checks” after our three demo trials to assess whether participants understood the nature of the error clamp and target jump manipulations: “Identify the correct statement. Press 'a': I will aim away from the original target. I will ignore the white dot. Press 'b': I will aim directly towards the original target location and ignore the white dot.” The experiment was terminated if participants failed to make an accurate keypress (i.e., “b”).

The block structure in Exp 3 and 4 were the same, composed of a baseline block with veridical feedback (28 trials) and a perturbation block with clamp feedback paired with target jumps (Exp 3: 120 trials; Exp 4: 252 trials). All perturbation conditions were randomized in a zero-mean manner throughout the experiment. The perturbation conditions were again divided into sets (See Table 1; Exp 3: Sets A—B; Exp 4: Sets A—D) to sample a wider range of clamp size x target jump combinations, while keeping the experiment within 1 hour. There were 30 trials per clamp size x target jump combination in Exp 3 and 18 trials per combination in Exp 4.

#### *Data analysis, Model Free*

The primary dependent variable of reach performance was the hand angle, defined as the hand position relative to the target when the movement amplitude reached the target distance (i.e., angle between the lines connecting start position to target and start position to hand).

Outlier responses were defined as trials in which the hand angle deviated by more than 3 standard deviations from a moving 5-trial window. These outlier trials were excluded from further analysis, since behavior on these trials could reflect attentional lapses or anticipatory movements to another target location (average percent of trials removed per participant  $\pm$  SD: Exp 1:  $0.2 \pm 0.2\%$ ; Exp 2:  $0.1 \pm 0.2\%$ ; Exp 3:  $0.8\% \pm 0.8\%$ ; Exp 4:  $1.1 \pm 0.1\%$ ).

As a measure of trial-by-trial implicit recalibration, we evaluated each participant’s median change in hand angle on trial  $n + 1$ , as a function of the perturbation condition (clamp size x target jump) on trial  $n$  ( $\Delta$  Hand Angle).

We sought to determine whether SPE + TE and TE-only perturbations elicit robust sign-dependent changes in hand angle (Exp 1 and 2). Specifically, in the SPE + TE condition, we expect implicit recalibration to result in a change in hand angle

508 in the opposite direction of the error clamp (e.g., a CW clamp eliciting a CCW change in hand angle). In contrast, in the  
509 TE-only condition, we expect implicit recalibration to be in the same direction as the target jump (e.g., a CW target jump  
510 eliciting a CW change in hand angle). To better visualize the difference between SPE + TE and TE-only conditions, the  
511 sign of the target jump was flipped, such that the expected change in hand angle would also be in the opposite direction of  
512 the perturbation (i.e., a negative target jump would elicit a positive change in hand angle). Each participants' data were  
513 submitted to a linear regression with perturbation size (Exp 1: 0,  $\pm 4^\circ$ ,  $\pm 16^\circ$ ; Exp 2, Set A: 0,  $\pm 4^\circ$ ; Exp 2, Set B: 0,  $\pm 4^\circ$ ,  $\pm 8^\circ$ )  
514 and perturbation type (clamp vs target jump) as main effects. The mean regression slopes ( $\beta$ )  $\pm$  SEM across participants  
515 were provided.

516  
517 To ask whether the effect of TE would be conditional on the presence of SPE, we submitted each participants' data in Exps  
518 2 and 3 to a linear regression with target jump size and task set as main effects. Post-hoc contrasts were performed using  
519 two tailed t-tests, and P values were Bonferroni corrected. The mean regression values ( $\beta$ )  $\pm$  SEM across participants were  
520 provided.

### 521 522 *Data analysis, Model Based*

523 In this section, we formalize the six models justified in the Results section titled: “*Modeling the potential ways in which TE*  
524 *and SPE may interact to drive implicit recalibration.*” The development of these models was based on different assumptions  
525 about how the size of target jumps ( $\theta_j$ ) and the size of the error clamp ( $\theta_c$ ) impact the processing of SPE and TE.

526  
527 The first set of models posit that the motor system responds only to SPE (Table 4: SPE only column): First, SPE may be  
528 impervious to target jumps (Invariant SPE), where motor updates are not affected by target jumps ( $U_{\theta_j=0}$ , or the motor  
529 update during no-jump). Second, SPE may be attenuated when the cursor lands in the target, modulated by intrinsic reward  
530 (Rewarded SPE). The amount of reward modulation could vary with  $\gamma_r$ , a gain value determining the amount of attenuation,  
531 and  $\sigma_r$ , the standard deviation of reward function determining the scope of attenuation. Third, SPE may be attenuated due  
532 to a distracting effect of target jumps, which may siphon attention away from processing feedback and/or the movement  
533 goal (Distracted SPE). The attenuation may be due to the presence of a target jump (a fixed cost,  $C_j$ ) and the size of the  
534 target jump (variable cost, modeled as a gaussian decay with standard deviation  $\sigma_d$ ).

535

536 We recognize that the distracted SPE hypothesis may take on a different form, where there may only be a fixed cost or only  
 537 be a variable cost (or a different type of variable cost, like an inverted gaussian). However, these models fail to qualitatively  
 538 capture our results, and therefore, we opted not to include these models in our formal analysis. We also recognize that, at  
 539 present, we only consider how target jump impacts learning from SPE, whereas target jumps may also impact learning from  
 540 TE.

541

542 Alternatively, implicit recalibration may also be driven by both SPE and TE-based learning processes (Table 4: SPE + TE).  
 543 The contribution of TE was assumed to vary with the distance between the cursor feedback and the new target position in a  
 544 linear fashion.  $\beta_{TE}$  captures the slope of this function, and the  $\theta_c - \theta_j$  term constrains implicit recalibration from TE to 0  
 545 when TE is 0 (i.e., when the target jumps onto the cursor feedback). This model assumes the net motor update ( $U_{Total}$ ) to  
 546 be the sum of a SPE-based learning process ( $U_{SPE}$ ) and a TE based learning process ( $U_{TE}$ ).

547

| Table 4        | SPE Only                                                                               | SPE + TE                                                                     |
|----------------|----------------------------------------------------------------------------------------|------------------------------------------------------------------------------|
| Invariant SPE  | $U_{SPE} = U_{\theta_j=0}$                                                             | $U_{Total} = U_{TE} + U_{SPE}$<br>$U_{TE} = \beta_{TE}(\theta_c - \theta_j)$ |
| Rewarded SPE   | $U_{SPE} = U_{\theta_j=0} - \gamma_r e^{-\frac{(\theta_c - \theta_j)^2}{2\sigma_r^2}}$ |                                                                              |
| Distracted SPE | $U_{SPE} = (U_{\theta_j=0} - C_j) e^{\frac{(\theta_j)^2}{2\sigma_d^2}}$                |                                                                              |

**Table 4: Summary of models.** Parameters could either be free (red) or fixed (black, based on empirical data in Exp 4).

548

549 We evaluated the six models by simultaneously fitting group-averaged data for both  $\pm 3^\circ$  and  $\pm 7^\circ$  clamp groups in Exp 4.  
 550 To quantify model performance, we calculated  $R^2$  and AIC (Akaike Information Criterion) scores. The winning model was  
 551 the model with the largest  $R^2$  and the smallest AIC. In order to calculate confidence intervals for the parameter estimates,  
 552 we applied standard bootstrapping techniques, constructing group-averaged hand angle data 1000 times by randomly  
 553 resampling with replacement from the pool of participants within each group. We started with 10 different initial sets of  
 554 parameter values and estimated parameter values that minimized the least squared error between the bootstrapped data and  
 555 the model output.

556

557

558 **Funding:** RBI is funded by the NIH (NINDS: NS116883; NIDCD: DC0170941). HEK is funded by NIH K12  
559 (HD055931). JST is funded by the PODSII scholarship from the Foundation for Physical Therapy Research.

560 **Acknowledgements:** We thank Joie Tang for her assistance with data collection (Exp 1a/b).

561 **Disclosures and Competing interests:** None to disclose.

## References

- Albert, S. T., Jang, J., Haith, A. M., Lerner, G., Della-Maggiore, V., Krakauer, J. W., & Shadmehr, R. (2020). Competition between parallel sensorimotor learning systems (p. 2020.12.01.406777). doi:10.1101/2020.12.01.406777
- Anguera, J. A., Reuter-Lorenz, P. A., Willingham, D. T., & Seidler, R. D. (2010). Contributions of spatial working memory to visuomotor learning. *Journal of Cognitive Neuroscience*, 22(9), 1917–1930.
- Anwyl-Irvine, A. L., Dalmaijer, E. S., Hodges, N., & Evershed, J. (2020). *Online Timing Accuracy and Precision: A comparison of platforms, browsers, and participant's devices*. doi:10.31234/osf.io/jfec
- Benson, B. L., Anguera, J. A., & Seidler, R. D. (2011). A spatial explicit strategy reduces error but interferes with sensorimotor adaptation. *Journal of Neurophysiology*, 105(6), 2843–2851.
- Bridges, D., Pitiot, A., MacAskill, M. R., & Peirce, J. W. (2020). The timing mega-study: comparing a range of experiment generators, both lab-based and online. *PeerJ*, 8, e9414.
- Burge, J., Ernst, M. O., & Banks, M. S. (2008). The statistical determinants of adaptation rate in human reaching. *Journal of Vision*, 8(4), 20.1-19.
- Butcher, P. A., Ivry, R. B., Kuo, S.-H., Rydz, D., Krakauer, J. W., & Taylor, J. A. (2017). The cerebellum does more than sensory prediction error-based learning in sensorimotor adaptation tasks. *Journal of Neurophysiology*, 118(3), 1622–1636.
- Cameron, B. D., Franks, I. M., Inglis, J. T., & Chua, R. (2010a). Implicit motor learning from target error during explicit reach control. *Experimental Brain Research*, 206(1), 99–104.
- Cameron, B. D., Franks, I. M., Inglis, J. T., & Chua, R. (2010b). Reach adaptation to explicit vs. implicit target error. *Experimental Brain Research*, 203(2), 367–380.
- Cashaback, J. G. A., McGregor, H. R., Mohatarem, A., & Gribble, P. L. (2017). Dissociating error-based and reinforcement-based loss functions during sensorimotor learning. *PLoS Computational Biology*, 13(7), e1005623.
- Dang, K. V., Parvin, D. E., & Ivry, R. B. (2019). *Exploring Contextual Interference in Implicit and Explicit Motor Learning* (p. 644211). doi:10.1101/644211
- Day, K. A., Roemmich, R. T., Taylor, J. A., & Bastian, A. J. (2016). Visuomotor Learning Generalizes Around the Intended Movement. *ENeuro*, 3(2). doi:10.1523/ENEURO.0005-16.2016

- 589 Donchin, O., Francis, J. T., & Shadmehr, R. (2003). Quantifying generalization from trial-by-trial behavior of adaptive  
590 systems that learn with basis functions: theory and experiments in human motor control. *The Journal of*  
591 *Neuroscience: The Official Journal of the Society for Neuroscience*, 23(27), 9032–9045.
- 592 Doshier, B. A., Sperling, G., & Wurst, S. A. (1986). Tradeoffs between stereopsis and proximity luminance covariance as  
593 determinants of perceived 3D structure. *Vision Research*, 26(6), 973–990.
- 594 Ernst, M. O., & Banks, M. S. (2002). Humans integrate visual and haptic information in a statistically optimal fashion.  
595 *Nature*, 415(6870), 429–433.
- 596 Galea, J. M., Mallia, E., Rothwell, J., & Diedrichsen, J. (2015). The dissociable effects of punishment and reward on motor  
597 learning. *Nature Neuroscience*, 18(4), 597–602.
- 598 Gonzalez Castro, L. N., Monsen, C. B., & Smith, M. A. (2011). The binding of learning to action in motor adaptation. *PLoS*  
599 *Computational Biology*, 7(6), e1002052.
- 600 Hadjiosif, A. M., Criscimagna-Hemminger, S. E., Gibo, T. L., Okamura, A. M., Shadmehr, R., Bastian, A. J., & Smith, M.  
601 A. (2014). Cerebellar damage reduces the stability of motor memories. *Proceeding of the Translational and*  
602 *Computational Motor Control*.
- 603 Haith, A. M., Huberdeau, D. M., & Krakauer, J. W. (2015). The influence of movement preparation time on the expression  
604 of visuomotor learning and savings. *The Journal of Neuroscience: The Official Journal of the Society for*  
605 *Neuroscience*, 35(13), 5109–5117.
- 606 Hayashi, T., Kato, Y., & Nozaki, D. (2020). Divisively Normalized Integration of Multisensory Error Information Develops  
607 Motor Memories Specific to Vision and Proprioception. *The Journal of Neuroscience: The Official Journal of the*  
608 *Society for Neuroscience*, 40(7), 1560–1570.
- 609 Heffley, W., & Hull, C. (2019). Classical conditioning drives learned reward prediction signals in climbing fibers across  
610 the lateral cerebellum. *ELife*, 8. doi:10.7554/eLife.46764
- 611 Hegele, M., & Heuer, H. (2010). Implicit and explicit components of dual adaptation to visuomotor rotations. *Consciousness*  
612 *and Cognition*, 19(4), 906–917.
- 613 Hull, C. (2020). Prediction signals in the cerebellum: beyond supervised motor learning. *ELife*, 9. doi:10.7554/eLife.54073
- 614 Izawa, J., Criscimagna-Hemminger, S. E., & Shadmehr, R. (2012). Cerebellar contributions to reach adaptation and learning  
615 sensory consequences of action. *The Journal of Neuroscience: The Official Journal of the Society for Neuroscience*,  
616 32(12), 4230–4239.

- 517 Izawa, J., & Shadmehr, R. (2011). Learning from sensory and reward prediction errors during motor adaptation. *PLoS*  
518 *Computational Biology*, 7(3), e1002012.
- 519 Kasuga, S., Hirashima, M., & Nozaki, D. (2013). Simultaneous processing of information on multiple errors in visuomotor  
520 learning. *PloS One*, 8(8), e72741.
- 521 Kim, H. E., Avraham, G., & Ivry, R. B. (2020). The Psychology of Reaching: Action Selection, Movement Implementation,  
522 and Sensorimotor Learning. *Annual Review of Psychology*. doi:10.1146/annurev-psych-010419-051053
- 523 Kim, H. E., Morehead, J. R., Parvin, D. E., Moazzezi, R., & Ivry, R. B. (2018). Invariant errors reveal limitations in motor  
524 correction rather than constraints on error sensitivity. *Communications Biology*, 1, 19.
- 525 Kim, H. E., Parvin, D. E., & Ivry, R. B. (2019). The influence of task outcome on implicit motor learning. *ELife*, 8.  
526 doi:10.7554/eLife.39882
- 527 Kinchla, R. (1992). Attention. *Annual Review of Psychology*, 43(1), 711–742.
- 528 Körding, Konrad P., Beierholm, U., Ma, W. J., Quartz, S., Tenenbaum, J. B., & Shams, L. (2007). Causal inference in  
529 multisensory perception. *PloS One*, 2(9), e943.
- 530 Körding, Konrad P., & Wolpert, D. M. (2004). Bayesian integration in sensorimotor learning. *Nature*, 427(6971), 244–247.
- 531 Körding, Konrad Paul, & Wolpert, D. M. (2004). The loss function of sensorimotor learning. *Proceedings of the National*  
532 *Academy of Sciences of the United States of America*, 101(26), 9839–9842.
- 533 Krakauer, J., Hadjiosif, A. M., Xu, J., Wong, A. L., & Haith, A. M. (2019). Motor Learning. *Comprehensive Physiology*,  
534 9(2), 613–663.
- 535 Krakauer, J. W., Ghilardi, M. F., & Ghez, C. (1999). Independent learning of internal models for kinematic and dynamic  
536 control of reaching. *Nature Neuroscience*, 2(11), 1026–1031.
- 537 Lee, K., Oh, Y., Izawa, J., & Schweighofer, N. (2018). Sensory prediction errors, not performance errors, update memories  
538 in visuomotor adaptation. *Scientific Reports*, 8(1), 16483.
- 539 Leow, L.-A., Marinovic, W., de Rugy, A., & Carroll, T. J. (2018). Task errors contribute to implicit aftereffects in  
540 sensorimotor adaptation. *The European Journal of Neuroscience*, 48(11), 3397–3409.
- 541 Leow, L.-A., Marinovic, W., de Rugy, A., & Carroll, T. J. (2020). Task Errors Drive Memories That Improve Sensorimotor  
542 Adaptation (pp. 3075–3088). doi:10.1523/JNEUROSCI.1506-19.2020
- 543 Lerner, G., Albert, S., Caffaro, P. A., Villalta, J. I., Jacobacci, F., Shadmehr, R., & Della-Maggiore, V. (2020). The Origins  
544 of Anterograde Interference in Vxisuomotor Adaptation. *Cerebral Cortex* . doi:10.1093/cercor/bhaa016

- 545 Magescas, F., & Prablanc, C. (2006). Automatic drive of limb motor plasticity. *Journal of Cognitive Neuroscience*, 18(1),  
546 75–83.
- 547 Mazzoni, P., & Krakauer, J. W. (2006). An implicit plan overrides an explicit strategy during visuomotor adaptation. *The*  
548 *Journal of Neuroscience: The Official Journal of the Society for Neuroscience*, 26(14), 3642–3645.
- 549 McDougale, S. D., Ivry, R. B., & Taylor, J. A. (2016). Taking Aim at the Cognitive Side of Learning in Sensorimotor  
550 Adaptation Tasks. *Trends in Cognitive Sciences*, 20(7), 535–544.
- 551 Miyamoto, Y. R., Wang, S., & Smith, M. A. (2020). Implicit adaptation compensates for erratic explicit strategy in human  
552 motor learning. *Nature Neuroscience*, 23(3), 443–455.
- 553 Morehead, J. R., Taylor, J. A., Parvin, D. E., & Ivry, R. B. (2017). Characteristics of Implicit Sensorimotor Adaptation  
554 Revealed by Task-irrelevant Clamped Feedback. *Journal of Cognitive Neuroscience*, 29(6), 1061–1074.
- 555 Nikooyan, A. A., & Ahmed, A. A. (2015). Reward feedback accelerates motor learning. *Journal of Neurophysiology*,  
556 113(2), 633–646.
- 557 Ohmae, S., & Medina, J. F. (2015). Climbing fibers encode a temporal-difference prediction error during cerebellar learning  
558 in mice. *Nature Neuroscience*, 18(12), 1798–1803.
- 559 Oldfield, R. C. (1971). The assessment and analysis of handedness: the Edinburgh inventory. *Neuropsychologia*, 9(1), 97–  
560 113.
- 561 Oza, A., Kumar, A., & Mutha, P. K. (2020). Task Errors Do Not Induce Implicit Sensorimotor Learning (p.  
562 2020.11.13.381285). doi:10.1101/2020.11.13.381285
- 563 Ranjan, T., & Smith, M. (2020, October 21). *Implicit motor adaptation is driven by motor performance prediction error*  
564 *rather than sensory prediction error*. Presented at the Motor Control and Motor Learning.
- 565 Ryan Morehead, J., & de Xivry, J.-J. O. (2021). A Synthesis of the Many Errors and Learning Processes of Visuomotor  
566 Adaptation. *BioRxiv*. doi:10.1101/2021.03.14.435278
- 567 Schlerf, J. E., Xu, J., Klemfuss, N. M., Griffiths, T. L., & Ivry, R. B. (2013). Individuals with cerebellar degeneration show  
568 similar adaptation deficits with large and small visuomotor errors. *Journal of Neurophysiology*, 109(4), 1164–1173.
- 569 Sendhilnathan, N., Ipata, A. E., & Goldberg, M. E. (2020). Neural Correlates of Reinforcement Learning in Mid-lateral  
570 Cerebellum. *Neuron*. doi:10.1016/j.neuron.2019.12.032
- 571 Shadmehr, R., Smith, M. A., & Krakauer, J. W. (2010). Error correction, sensory prediction, and adaptation in motor control.  
572 *Annual Review of Neuroscience*, 33, 89–108.



- 573 Shams, L., & Beierholm, U. R. (2010). Causal inference in perception. *Trends in Cognitive Sciences*, 14(9), 425–432.
- 574 Shmuelof, L., Huang, V. S., Haith, A. M., Delnicki, R. J., Mazzoni, P., & Krakauer, J. W. (2012). Overcoming motor  
575 “forgetting” through reinforcement of learned actions. *The Journal of Neuroscience: The Official Journal of the*  
576 *Society for Neuroscience*, 32(42), 14617–14621.
- 577 Song, J.-H. (2019). The role of attention in motor control and learning. *Current Opinion in Psychology*, 29, 261–265.
- 578 Taylor, J. A., & Ivry, R. B. (2011). Flexible cognitive strategies during motor learning. *PLoS Computational Biology*, 7(3),  
579 e1001096.
- 580 Taylor, J. A., & Ivry, R. B. (2014). Cerebellar and prefrontal cortex contributions to adaptation, strategies, and reinforcement  
581 learning. *Progress in Brain Research*, 210, 217–253.
- 582 Taylor, J. A., Klemfuss, N. M., & Ivry, R. B. (2010). An explicit strategy prevails when the cerebellum fails to compute  
583 movement errors. *Cerebellum*, 9(4), 580–586.
- 584 Taylor, J. A., Krakauer, J. W., & Ivry, R. B. (2014). Explicit and implicit contributions to learning in a sensorimotor  
585 adaptation task. *The Journal of Neuroscience: The Official Journal of the Society for Neuroscience*, 34(8), 3023–  
586 3032.
- 587 Taylor, J. A., & Thoroughman, K. A. (2007). Divided attention impairs human motor adaptation but not feedback control.  
588 *Journal of Neurophysiology*, 98(1), 317–326.
- 589 Tsay, J. S., Avraham, G., Kim, H. E., Parvin, D. E., Wang, Z., & Ivry, R. B. (2020). The Effect of Visual Uncertainty on  
590 Implicit Motor Adaptation. *Journal of Neurophysiology*. doi:10.1152/jn.00493.2020
- 591 Tsay, J. S., Kim, H. E., Parvin, D. E., Stover, A. R., & Ivry, R. B. (2021). Individual differences in proprioception predict  
592 the extent of implicit sensorimotor adaptation. *Journal of Neurophysiology*. doi:10.1152/jn.00585.2020
- 593 Tsay, J. S., Lee, A. S., Avraham, G., Parvin, D. E., Ho, J., Boggess, M., ... Ivry, R. (2020). OnPoint: A package for online  
594 experiments in motor control and motor learning. doi:10.31234/osf.io/hwmpy
- 595 Tsay, J. S., Lee, A. S., Ivry, R. B., & Avraham, G. (2021). Moving outside the lab: The viability of conducting sensorimotor  
596 learning studies online (p. 2021.01.30.181370). doi:10.1101/2021.01.30.181370
- 597 Tsay, J. S., Parvin, D. E., & Ivry, R. B. (2020). Continuous reports of sensed hand position during sensorimotor adaptation.  
598 *Journal of Neurophysiology*, 124(4), 1122–1130.
- 599 Tseng, Y.-W., Diedrichsen, J., Krakauer, J. W., Shadmehr, R., & Bastian, A. J. (2007). Sensory prediction errors drive  
700 cerebellum-dependent adaptation of reaching. *Journal of Neurophysiology*, 98(1), 54–62.

- 701 Wagner, M. J., Kim, T. H., Savall, J., Schnitzer, M. J., & Luo, L. (2017). Cerebellar granule cells encode the expectation of  
702 reward. *Nature*, *544*(7648), 96–100.
- 703 Wei, K., & Körding, K. (2009). Relevance of error: what drives motor adaptation? *Journal of Neurophysiology*, *101*(2),  
704 655–664.
- 705 Wei, K., & Körding, K. (2010). Uncertainty of feedback and state estimation determines the speed of motor adaptation.  
706 *Frontiers in Computational Neuroscience*, *4*, 11.
- 707 Werner, S., van Aken, B. C., Hulst, T., Frens, M. A., van der Geest, J. N., Strüder, H. K., & Donchin, O. (2015). Awareness  
708 of sensorimotor adaptation to visual rotations of different size. *PloS One*, *10*(4), e0123321.
- 709 Wolpert, D. M., Miall, R. C., & Kawato, M. (1998). Internal models in the cerebellum. *Trends in Cognitive Sciences*, *2*(9),  
710 338–347.
